# Supplementary material for: Gene co-expression network for analysis of plasma exosomal miRNAs in the elderly as markers of aging and cognitive decline
Source: PubMed Central journal article supplement (PMC6951281; doi:10.7717/peerj.8318), 2020-01-06
Supplement: peerj-08-8318-s004.pdf [file peerj-08-8318-s004.pdf]

Optimal soft  
threshold  $\beta=10$

Calculate the co-expression  
module height=0.2

Correlation between modules and phenotypes and  
correlation between genes and phenotypes in  
modules

hub miRNA in each  
module

Data preprocess

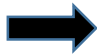

WGCNA

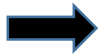

miRNA target gene  
prediction

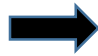

Target gene function  
enrichment analysis:  
KEGG, REACTOME

97 samples, 2588 miRNAs, 3 phenotypes

Removal of NA-expressing miRNAs

Screening for miRNAs with a  
standard deviation greater than 0.5

Sample clustering, culling outlier samples

91 samples, 302 miRNAs
