# Supplementary material for: Gene co-expression network for analysis of plasma exosomal miRNAs in the elderly as markers of aging and cognitive decline
Source: PeerJ. 2020 Jan 6;8:e8318. doi: 10.7717/peerj.8318 (PMC6951281; doi:10.7717/peerj.8318)
Supplement: Supplemental Information 3 [file peerj-08-8318-s003.xlsx]

## Sheet: blue module
DataBase	Pathway	Total	Expected	Hits	Pval	Hits_ratio
KEGG	Pathways in cancer	310	20.3	50	1.59e-07	0.16129
KEGG	HTLV-I infection	199	13	34	1.35e-05	0.170854
KEGG	Chronic myeloid leukemia	73	4.77	18	4.27e-05	0.246575
KEGG	Glioma	65	4.25	16	0.000113	0.246154
KEGG	Prostate cancer	87	5.69	19	0.000113	0.218391
KEGG	Pancreatic cancer	69	4.51	16	0.000218	0.231884
KEGG	p53 signaling pathway	68	4.45	15	0.000699	0.220588
KEGG	Insulin signaling pathway	137	8.96	22	0.00151	0.160584
KEGG	Bladder cancer	29	1.9	9	0.00151	0.310345
KEGG	Melanoma	68	4.45	14	0.00187	0.205882
KEGG	Non-small cell lung cancer	52	3.4	12	0.00187	0.230769
KEGG	ErbB signaling pathway	87	5.69	16	0.00229	0.183908
KEGG	Chagas disease (American trypanosomiasis)	89	5.82	16	0.0026	0.179775
KEGG	Small cell lung cancer	80	5.23	15	0.0026	0.1875
KEGG	Axon guidance	118	7.72	19	0.00279	0.161017
KEGG	Aldosterone-regulated sodium reabsorption	34	2.22	9	0.00301	0.264706
KEGG	Prion diseases	21	1.37	7	0.00301	0.333333
KEGG	Colorectal cancer	49	3.2	11	0.00301	0.22449
KEGG	Renal cell carcinoma	60	3.92	12	0.00456	0.2
KEGG	Progesterone-mediated oocyte maturation	80	5.23	14	0.00617	0.175
Reactome	PI3K events in ERBB4 signaling	94	6.39	20	0.000351	0.212766
Reactome	PIP3 activates AKT signaling	94	6.39	20	0.000351	0.212766
Reactome	Signaling by SCF-KIT	133	9.05	25	0.000351	0.18797
Reactome	GAB1 signalosome	98	6.66	21	0.000351	0.214286
Reactome	Downstream signal transduction	151	10.3	28	0.000351	0.18543
Reactome	Signaling by PDGF	177	12	30	0.000351	0.169492
Reactome	PI3K events in ERBB2 signaling	94	6.39	20	0.000351	0.212766
Reactome	Cellular responses to stress	256	17.4	40	0.000351	0.15625
Reactome	Fc epsilon receptor (FCERI) signaling	169	11.5	30	0.000351	0.177515
Reactome	PI-3K cascade:FGFR1	94	6.39	20	0.000351	0.212766
Reactome	PI-3K cascade:FGFR2	94	6.39	20	0.000351	0.212766
Reactome	PI-3K cascade:FGFR3	94	6.39	20	0.000351	0.212766
Reactome	PI-3K cascade:FGFR4	94	6.39	20	0.000351	0.212766
Reactome	PI3K/AKT activation	97	6.6	20	0.000542	0.206186
Reactome	Signaling by ERBB2	152	10.3	26	0.000705	0.171053
Reactome	Signaling by ERBB4	143	9.73	25	0.000705	0.174825
Reactome	NGF signalling via TRKA from the plasma membrane	189	12.9	30	0.000705	0.15873
Reactome	Nephrin interactions	23	1.56	9	0.000705	0.391304
Reactome	Pre-NOTCH Expression and Processing	24	1.63	9	0.000916	0.375
Reactome	Oncogene Induced Senescence	30	2.04	10	0.000916	0.333333
Reactome	Role of LAT2/NTAL/LAB on calcium mobilization	103	7.01	20	0.000916	0.194175
Reactome	Downstream signaling of activated FGFR1	139	9.45	24	0.000916	0.172662
Reactome	Downstream signaling of activated FGFR2	139	9.45	24	0.000916	0.172662
Reactome	Downstream signaling of activated FGFR3	139	9.45	24	0.000916	0.172662
Reactome	Downstream signaling of activated FGFR4	139	9.45	24	0.000916	0.172662
Reactome	Cellular Senescence	143	9.73	24	0.00143	0.167832
Reactome	Signaling by EGFR	168	11.4	26	0.00275	0.154762
Reactome	Signaling by FGFR	151	10.3	24	0.0028	0.15894
Reactome	Oxidative Stress Induced Senescence	88	5.98	17	0.0028	0.193182
Reactome	Signaling by FGFR1	151	10.3	24	0.0028	0.15894
Reactome	Signaling by FGFR2	151	10.3	24	0.0028	0.15894
Reactome	Signaling by FGFR3	151	10.3	24	0.0028	0.15894
Reactome	Signaling by FGFR4	151	10.3	24	0.0028	0.15894
Reactome	Signalling by NGF	273	18.6	36	0.00288	0.131868
Reactome	Signaling by TGF-beta Receptor Complex	72	4.9	15	0.00288	0.208333
Reactome	DAP12 interactions	171	11.6	26	0.00288	0.152047
Reactome	PI3K/AKT Signaling in Cancer	81	5.51	16	0.00303	0.197531
Reactome	Transcriptional activity of SMAD2/SMAD3:SMAD4 heterotrimer	43	2.92	11	0.00327	0.255814
Reactome	DAP12 signaling	154	10.5	24	0.00327	0.155844
Reactome	Pre-NOTCH Transcription and Translation	19	1.29	7	0.00503	0.368421
Reactome	Downregulation of TGF-beta receptor signaling	26	1.77	8	0.00701	0.307692
Reactome	Downstream signaling events of B Cell Receptor (BCR)	164	11.2	24	0.00817	0.146341
Reactome	CD28 dependent PI3K/Akt signaling	15	1.02	6	0.00837	0.4
GOBP	positive regulation of cellular component organization	560	37.9	67	0.00261	0.119643
GOBP	negative regulation of transcription from RNA polymerase II promoter	552	37.3	64	0.004	0.115942
GOBP	regulation of sequence-specific DNA binding transcription factor activity	372	25.2	48	0.004	0.129032
GOBP	aging	197	13.3	29	0.00915	0.147208
GOBP	positive regulation of cell proliferation	786	53.1	81	0.00915	0.103053
GOBP	positive regulation of transcription from RNA polymerase II promoter	800	54.1	82	0.00915	0.1025
GOBP	positive regulation of transcription, DNA-dependent	1260	85.1	119	0.00915	0.0944444
GOBP	positive regulation of transcription, DNA-dependent	1260	85.1	119	0.00915	0.0944444
GOBP	nucleoplasm part	910	58.6	90	0.00602	0.0989011
GOCC	transcription factor complex	303	19.5	37	0.0149	0.122112
GOCC	nucleoplasm	1820	117	153	0.0194	0.0840659
GOCC	nuclear body	295	19	35	0.0194	0.118644
GOCC	membrane raft	189	12.2	25	0.0215	0.132275
GOMF	protein domain specific binding	560	36.6	65	0.0016	0.116071
GOMF	positive regulation of transcription, DNA-dependent	1260	82.3	119	0.00381	0.0944444
GOMF	negative regulation of transcription, DNA-dependent	987	64.5	94	0.0159	0.0952381
GOMF	RNA polymerase II distal enhancer sequence-specific DNA binding transcription factor activity	110	7.19	18	0.0257	0.163636
GOMF	transcription from RNA polymerase II promoter	1930	126	161	0.0376	0.0834197

## Sheet: brown module
DataBase	Pathway	Total	Expected	Hits	Pval	Hits_ratio
KEGG	Pathways in cancer	310	39.9	84	5.07e-10	0.270968
KEGG	Prostate cancer	87	11.2	36	2.12e-09	0.413793
KEGG	Chronic myeloid leukemia	73	9.39	31	1.68e-08	0.424658
KEGG	Glioma	65	8.36	27	3.38e-07	0.415385
KEGG	Neurotrophin signaling pathway	123	15.8	39	1.16e-06	0.317073
KEGG	Bladder cancer	29	3.73	16	2.26e-06	0.551724
KEGG	Pancreatic cancer	69	8.88	25	1.69e-05	0.362319
KEGG	Cell cycle	124	16	35	6.72e-05	0.282258
KEGG	HTLV-I infection	199	25.6	49	6.72e-05	0.246231
KEGG	Non-small cell lung cancer	52	6.69	20	6.72e-05	0.384615
KEGG	Epstein-Barr virus infection	91	11.7	28	9.84e-05	0.307692
KEGG	Melanoma	68	8.75	23	0.00011	0.338235
KEGG	Focal adhesion	200	25.7	48	0.000129	0.24
KEGG	Small cell lung cancer	80	10.3	25	0.000184	0.3125
KEGG	Colorectal cancer	49	6.3	18	0.000251	0.367347
KEGG	ErbB signaling pathway	87	11.2	26	0.000264	0.298851
KEGG	p53 signaling pathway	68	8.75	21	0.000869	0.308824
KEGG	NOD-like receptor signaling pathway	49	6.3	17	0.000869	0.346939
KEGG	Insulin signaling pathway	137	17.6	34	0.000946	0.248175
KEGG	MAPK signaling pathway	265	34.1	55	0.00154	0.207547
KEGG	Toxoplasmosis	93	12	25	0.00197	0.268817
KEGG	mTOR signaling pathway	45	5.79	15	0.00302	0.333333
KEGG	Fc epsilon RI signaling pathway	75	9.65	21	0.00316	0.28
KEGG	Renal cell carcinoma	60	7.72	18	0.00317	0.3
KEGG	Acute myeloid leukemia	57	7.33	17	0.00477	0.298246
KEGG	Aldosterone-regulated sodium reabsorption	34	4.37	12	0.00569	0.352941
KEGG	Endometrial cancer	44	5.66	14	0.00662	0.318182
KEGG	Progesterone-mediated oocyte maturation	80	10.3	21	0.00667	0.2625
KEGG	Adherens junction	70	9	19	0.00725	0.271429
Reactome	Gene Expression	851	107	180	4.75e-11	0.211516
Reactome	Peptide chain elongation	88	11.1	36	1.16e-08	0.409091
Reactome	Nonsense Mediated Decay (NMD) independent of the Exon Junction Complex (EJC)	93	11.7	37	1.16e-08	0.397849
Reactome	Eukaryotic Translation Elongation	91	11.5	36	1.97e-08	0.395604
Reactome	Eukaryotic Translation Termination	88	11.1	35	2.1e-08	0.397727
Reactome	Nonsense-Mediated Decay (NMD)	110	13.9	40	2.1e-08	0.363636
Reactome	Nonsense Mediated Decay (NMD) enhanced by the Exon Junction Complex (EJC)	110	13.9	40	2.1e-08	0.363636
Reactome	Viral mRNA Translation	86	10.8	34	3.45e-08	0.395349
Reactome	Influenza Life Cycle	117	14.8	41	3.61e-08	0.350427
Reactome	Influenza Infection	122	15.4	42	3.71e-08	0.344262
Reactome	Cellular responses to stress	256	32.3	68	6.91e-08	0.265625
Reactome	Eukaryotic Translation Initiation	116	14.6	39	2.72e-07	0.336207
Reactome	Cap-dependent Translation Initiation	116	14.6	39	2.72e-07	0.336207
Reactome	L13a-mediated translational silencing of Ceruloplasmin expression	108	13.6	37	3.37e-07	0.342593
Reactome	3' -UTR-mediated translational regulation	108	13.6	37	3.37e-07	0.342593
Reactome	Influenza Viral RNA Transcription and Replication	113	14.2	38	3.52e-07	0.336283
Reactome	GTP hydrolysis and joining of the 60S ribosomal subunit	109	13.7	37	3.97e-07	0.33945
Reactome	Cellular Senescence	143	18	44	4.37e-07	0.307692
Reactome	Disease	669	84.4	134	4.37e-07	0.200299
Reactome	Fc epsilon receptor (FCERI) signaling	169	21.3	49	4.87e-07	0.289941
Reactome	Formation of a pool of free 40S subunits	98	12.4	34	7.18e-07	0.346939
Reactome	Translation	146	18.4	44	7.25e-07	0.30137
Reactome	SRP-dependent cotranslational protein targeting to membrane	109	13.7	36	1.08e-06	0.330275
Reactome	Oncogene Induced Senescence	30	3.78	16	4.92e-06	0.533333
Reactome	Oxidative Stress Induced Senescence	88	11.1	30	6.88e-06	0.340909
Reactome	MAP kinase activation in TLR cascade	49	6.18	20	3.16e-05	0.408163
Reactome	NGF signalling via TRKA from the plasma membrane	189	23.8	48	4.38e-05	0.253968
Reactome	Diseases of signal transduction	235	29.6	56	4.91e-05	0.238298
Reactome	Signaling by Type 1 Insulin-like Growth Factor 1 Receptor (IGF1R)	87	11	28	5.7e-05	0.321839
Reactome	IGF1R signaling cascade	87	11	28	5.7e-05	0.321839
Reactome	IRS-related events triggered by IGF1R	84	10.6	27	8.75e-05	0.321429
GOBP	negative regulation of transcription from RNA polymerase II promoter	552	61.9	112	5.38e-08	0.202899
GOBP	viral infectious cycle	241	27	62	5.38e-08	0.257261
GOBP	macromolecular complex disassembly	189	21.2	53	5.38e-08	0.280423
GOBP	cellular protein complex disassembly	160	18	47	5.69e-08	0.29375
GOBP	protein complex disassembly	167	18.7	48	6.7e-08	0.287425
GOBP	viral reproductive process	597	67	115	3.82e-07	0.19263
GOBP	cellular component disassembly	310	34.8	70	7.16e-07	0.225806
GOBP	positive regulation of cell cycle	113	12.7	35	1.18e-06	0.309735
GOBP	RNA catabolic process	256	28.7	60	1.61e-06	0.234375
GOBP	protein targeting	545	61.1	104	2.25e-06	0.190826
GOBP	regulation of transcription from RNA polymerase II promoter	1610	180	248	2.39e-06	0.154037
GOBP	G1/S transition of mitotic cell cycle	209	23.4	51	3.55e-06	0.244019
GOBP	regulation of cellular protein metabolic process	1560	175	240	3.66e-06	0.153846
GOBP	positive regulation of cellular protein metabolic process	968	109	162	3.66e-06	0.167355
GOBP	negative regulation of RNA metabolic process	1020	115	169	4.58e-06	0.165686
GOBP	protein targeting to membrane	158	17.7	41	8.69e-06	0.259494
GOBP	negative regulation of apoptotic process	679	76.2	120	8.69e-06	0.17673
GOBP	regulation of MAPK cascade	559	62.7	103	8.69e-06	0.184258
GOBP	negative regulation of apoptotic process	679	76.2	120	8.69e-06	0.17673
GOBP	negative regulation of transcription, DNA-dependent	987	111	162	8.95e-06	0.164134
GOBP	negative regulation of transcription, DNA-dependent	987	111	162	8.95e-06	0.164134
GOBP	intracellular protein transport	793	89	135	1.19e-05	0.17024
GOBP	negative regulation of programmed cell death	691	77.5	120	1.86e-05	0.173661
GOBP	negative regulation of cell proliferation	585	65.6	105	1.91e-05	0.179487
GOBP	response to hypoxia	245	27.5	54	2.43e-05	0.220408
GOBP	aging	197	22.1	46	2.62e-05	0.233503
GOCC	cytosol	2660	278	414	5.67e-17	0.155639
GOCC	cytosolic part	204	21.3	53	2.52e-08	0.259804
GOCC	nucleoplasm part	910	95	147	2.54e-06	0.161538
GOCC	nucleoplasm	1820	190	258	4.78e-06	0.141758
GOCC	ribosomal subunit	154	16.1	38	1.47e-05	0.246753
GOCC	mitochondrial outer membrane	133	13.9	33	6.28e-05	0.24812
GOCC	nuclear lumen	2690	281	349	9.5e-05	0.12974
GOMF	nucleotide binding	2470	269	366	8.09e-09	0.148178
GOMF	ATP binding	1490	162	238	2.8e-08	0.159732
GOMF	adenyl nucleotide binding	1530	167	241	4.77e-08	0.157516
GOMF	adenyl ribonucleotide binding	1530	166	241	4.77e-08	0.157516
GOMF	purine nucleotide binding	1900	207	286	7.37e-08	0.150526
GOMF	enzyme binding	1200	131	196	7.37e-08	0.163333
GOMF	purine ribonucleotide binding	1890	206	285	7.37e-08	0.150794
GOMF	RNA binding	976	106	161	1.22e-06	0.164959
GOMF	negative regulation of transcription, DNA-dependent	987	107	162	1.38e-06	0.164134
GOMF	transcription factor binding	509	55.4	94	6.12e-06	0.184676
GOMF	phosphatase binding	116	12.6	31	5.25e-05	0.267241
GOMF	transcription from RNA polymerase II promoter	1930	210	271	6.57e-05	0.140415
GOMF	positive regulation of transcription, DNA-dependent	1260	137	188	6.57e-05	0.149206

## Sheet: turquoise module
DataBase	Pathway	Total	Expected	Hits	Pval	Hits_ratio
KEGG	Cell cycle	124	17.3	47	3.12e-09	0.379032
KEGG	Pathways in cancer	310	43.3	84	2.2e-08	0.270968
KEGG	p53 signaling pathway	68	9.49	30	8.04e-08	0.441176
KEGG	Chronic myeloid leukemia	73	10.2	30	4.69e-07	0.410959
KEGG	Epstein-Barr virus infection	91	12.7	34	6.98e-07	0.373626
KEGG	Neurotrophin signaling pathway	123	17.2	41	9.11e-07	0.333333
KEGG	Colorectal cancer	49	6.84	22	4.09e-06	0.44898
KEGG	Pancreatic cancer	69	9.63	27	4.47e-06	0.391304
KEGG	TGF-beta signaling pathway	84	11.7	30	8.78e-06	0.357143
KEGG	HTLV-I infection	199	27.8	54	9.33e-06	0.271357
KEGG	Glioma	65	9.07	24	5.45e-05	0.369231
KEGG	MAPK signaling pathway	265	37	63	0.000123	0.237736
KEGG	Prostate cancer	87	12.1	28	0.000156	0.321839
KEGG	Wnt signaling pathway	144	20.1	39	0.000282	0.270833
KEGG	Osteoclast differentiation	119	16.6	34	0.000282	0.285714
KEGG	Jak-STAT signaling pathway	99	13.8	29	0.000652	0.292929
KEGG	Toxoplasmosis	93	13	27	0.00132	0.290323
KEGG	Non-small cell lung cancer	52	7.26	18	0.00157	0.346154
KEGG	Small cell lung cancer	80	11.2	24	0.00163	0.3
KEGG	Melanoma	68	9.49	21	0.00255	0.308824
KEGG	Oocyte meiosis	108	15.1	29	0.0027	0.268519
KEGG	Protein processing in endoplasmic reticulum	129	18	33	0.0027	0.255814
KEGG	B cell receptor signaling pathway	75	10.5	22	0.00359	0.293333
KEGG	Acute myeloid leukemia	57	7.95	18	0.00434	0.315789
KEGG	Influenza A	107	14.9	28	0.00459	0.261682
KEGG	ErbB signaling pathway	87	12.1	24	0.00479	0.275862
KEGG	RIG-I-like receptor signaling pathway	49	6.84	16	0.00521	0.326531
KEGG	Apoptosis	83	11.6	23	0.00537	0.277108
KEGG	Hepatitis C	100	14	26	0.00688	0.26
KEGG	Renal cell carcinoma	60	8.37	18	0.00688	0.3
KEGG	Bladder cancer	29	4.05	11	0.00793	0.37931
KEGG	Measles	102	14.2	26	0.00856	0.254902
Reactome	Cellular responses to stress	256	37.1	85	1.39e-11	0.332031
Reactome	Cellular Senescence	143	20.7	57	3.39e-11	0.398601
Reactome	Signaling by TGF-beta Receptor Complex	72	10.4	34	1.2e-08	0.472222
Reactome	Fc epsilon receptor (FCERI) signaling	169	24.5	58	1.58e-08	0.343195
Reactome	Oxidative Stress Induced Senescence	88	12.8	37	6.46e-08	0.420455
Reactome	Oncogene Induced Senescence	30	4.35	19	2.37e-07	0.633333
Reactome	Gene Expression	851	123	183	3.93e-07	0.215041
Reactome	TGF-beta receptor signaling activates SMADs	32	4.64	19	8.44e-07	0.59375
Reactome	Downregulation of TGF-beta receptor signaling	26	3.77	16	6.15e-06	0.615385
Reactome	Pre-NOTCH Expression and Processing	24	3.48	15	1.01e-05	0.625
Reactome	Transcriptional activity of SMAD2/SMAD3:SMAD4 heterotrimer	43	6.24	21	1.01e-05	0.488372
Reactome	Pre-NOTCH Transcription and Translation	19	2.76	13	1.44e-05	0.684211
Reactome	Immune System	942	137	187	7.76e-05	0.198514
GOBP	negative regulation of transcription from RNA polymerase II promoter	552	76.8	133	3.79e-08	0.240942
GOBP	negative regulation of transcription, DNA-dependent	987	137	199	3.71e-06	0.201621
GOBP	negative regulation of transcription, DNA-dependent	987	137	199	3.71e-06	0.201621
GOBP	positive regulation of transcription from RNA polymerase II promoter	800	111	167	3.86e-06	0.20875
GOBP	negative regulation of RNA metabolic process	1020	142	204	3.87e-06	0.2
GOBP	regulation of translation	228	31.7	62	9.9e-06	0.27193
GOBP	negative regulation of nucleobase-containing compound metabolic process	1130	157	219	9.9e-06	0.193805
GOBP	negative regulation of cellular biosynthetic process	1220	170	233	1.07e-05	0.190984
GOBP	negative regulation of biosynthetic process	1240	173	235	1.59e-05	0.189516
GOBP	regulation of transcription from RNA polymerase II promoter	1610	224	289	6.32e-05	0.179503
GOBP	transcription initiation from RNA polymerase II promoter	219	30.5	57	9.79e-05	0.260274
GOCC	nucleoplasm	1820	236	336	1.85e-10	0.184615
GOCC	nucleoplasm part	910	118	190	4.3e-10	0.208791
GOCC	nuclear lumen	2690	348	430	2.01e-05	0.159851
GOCC	cytosol	2660	344	423	4.02e-05	0.159023
GOMF	chromatin binding	338	45	91	5.03e-09	0.269231
GOMF	negative regulation of transcription, DNA-dependent	987	131	199	6.53e-08	0.201621
GOMF	enzyme binding	1200	160	229	3.29e-07	0.190833
GOMF	ubiquitin-protein ligase activity	291	38.7	72	7.87e-06	0.247423
GOMF	protein kinase binding	376	50	87	7.91e-06	0.231383
GOMF	kinase binding	418	55.6	94	8.47e-06	0.22488
GOMF	small conjugating protein ligase activity	313	41.7	74	1.67e-05	0.236422
GOMF	small conjugating protein ligase activity	313	41.7	74	1.67e-05	0.236422
GOMF	positive regulation of transcription, DNA-dependent	1260	167	227	1.67e-05	0.180159
GOMF	acid-amino acid ligase activity	349	46.4	79	3.86e-05	0.226361
GOMF	transcription from RNA polymerase II promoter	1930	257	322	9.63e-05	0.166839

## Sheet: yellow module
DataBase	Pathway	Total	Expected	Hits	Pval	Hits_ratio
KEGG	Chronic myeloid leukemia	73	3.37	15	0.000165	0.205479
KEGG	Pathways in cancer	310	14.3	32	0.00108	0.103226
KEGG	Melanoma	68	3.14	11	0.017	0.161765
KEGG	Cell cycle	124	5.72	15	0.0227	0.120968
KEGG	Non-small cell lung cancer	52	2.4	9	0.0227	0.173077
KEGG	Glioma	65	3	10	0.0247	0.153846
KEGG	Small cell lung cancer	80	3.69	11	0.0306	0.1375
KEGG	Shigellosis	47	2.17	8	0.0325	0.170213
KEGG	Dorso-ventral axis formation	12	0.554	4	0.038	0.333333
KEGG	Bladder cancer	29	1.34	6	0.038	0.206897
Reactome	Cellular responses to stress	256	13	34	0.000218	0.132812
Reactome	Regulation of actin dynamics for phagocytic cup formation	52	2.64	13	0.000518	0.25
Reactome	Oncogene Induced Senescence	30	1.52	10	0.000518	0.333333
Reactome	Cellular Senescence	143	7.25	22	0.000792	0.153846
Reactome	Post-transcriptional silencing by small RNAs	7	0.355	5	0.0016	0.714286
Reactome	Gene Expression	851	43.1	71	0.00195	0.0834313
Reactome	RHO GTPases Activate WASPs and WAVEs	30	1.52	9	0.002	0.3
Reactome	Oxidative Stress Induced Senescence	88	4.46	15	0.00472	0.170455
Reactome	Small interfering RNA (siRNA) biogenesis	9	0.456	5	0.00489	0.555556
Reactome	Fcgamma receptor (FCGR) dependent phagocytosis	72	3.65	13	0.0069	0.180556
Reactome	Downstream signaling events of B Cell Receptor (BCR)	164	8.31	20	0.0182	0.121951
Reactome	SHC-related events triggered by IGF1R	18	0.912	6	0.0182	0.333333
Reactome	mRNA Splicing - Major Pathway	115	5.83	16	0.0182	0.13913
Reactome	mRNA Splicing	115	5.83	16	0.0182	0.13913
Reactome	Platelet activation, signaling and aggregation	189	9.58	22	0.0182	0.116402
Reactome	Senescence-Associated Secretory Phenotype (SASP)	72	3.65	12	0.0184	0.166667
Reactome	Signaling by ERBB4	143	7.25	18	0.0214	0.125874
Reactome	Processing of Capped Intron-Containing Pre-mRNA	119	6.03	16	0.0214	0.134454
Reactome	Cell Cycle	498	25.2	43	0.0223	0.0863454
Reactome	GAB1 signalosome	98	4.97	14	0.0243	0.142857
